# Supplementary material for: Multiple lines of evidence reveal a new species of Krait (Squamata, Elapidae, Bungarus) from Southwestern China and Northern Myanmar
Source: Zookeys. 2021 Mar 18;1025:35–71. doi: 10.3897/zookeys.1025.62305 (PMC7994289; doi:10.3897/zookeys.1025.62305)
Supplement: Supplementary material 1 — Tables S1–S4 [file zookeys-1025-035-s001.xlsx]

## Sheet: Table S1
Table S1. DNA sequences used in this study.
No.	Taxa	Voucher numbers	Locality	cytb	ND4	COI	Reference
1	Bungarus bungaroides	KIZ 98R0186	Medog, Medog County, Tibet, China	AY973270			Kuch, et al., 2005
2	B. caeruleus	UK H7	Pakistan	AJ749305	AJ830220		Kuch, 2007
3	B. candidus	UK B39	Vicinity of Jambah, Losarang District, Indramayu Regency, West Java, Indonesia	AJ749329	AJ830235		Kuch, 2007
4	B. candidus	UK BcBa	Bali Island, Indonesia	AJ749339	AJ830245		Kuch, 2007
5	B. candidus	UK B21	Vicinity of Jambah, Losarang District, Indramayu Regency, West Java, Indonesia	AJ749341	AJ830228		Kuch, 2007
6	B. candidus	SYNU R180411	Endau Rompin National Park, Taman Negara, Johor, Malaysia	MN165133	MN165161	MN165148	This study
7	B. candidus	MVZ 258148	Virachey NP, Ratanakiri, Cambodia			KY769757	Nguyen et al., 2017
8	B. candidus	KIZ 100	Bu Gia Map NP, Binh Phuoc, Vietnam			KY769758	Nguyen et al., 2017
9	B. ceylonicus	RS-135	Sri Lanka	KC347457	KC347501		Pyron, et al., 2013
10	B. fasciatus	UK B24	Vicinity of Jolo, Central Java, Indonesia	AJ749350	AJ830244		Kuch, 2007
11	B. fasciatus	MVZ226610	Tam Dao NP, Vinh Phuc, Vietnam			KY769766	Nguyen et al., 2017
12	B. flaviceps	JAM 1946	Bukit Larut, Perak, Malaysia	AJ749351	AJ830251		Kuch, 2007
13	B. magnimaculatus	CAS 210526	Alaungdaw Kathapa, Sagaing, Myanmar			KY769768	Nguyen et al., 2017
14	B. magnimaculatus	CAS 210696	Sin Ma Taung, Magway, Myanmar			KY769769	Nguyen et al., 2017
15	B. magnimaculatus	CAS 215445	Alaungdaw Kathapa, Sagaing, Myanmar			KY769770	Nguyen et al., 2017
16	B. magnimaculatus	CAS 215958	Min Sone Taung, Mandalay, Myanmar			KY769771	Nguyen et al., 2017
17	B. magnimaculatus	CAS 215998	Min Sone Taung, Mandalay, Myanmar			KY769772	Nguyen et al., 2017
18	B. magnimaculatus	CAS 215999	Min Sone Taung, Mandalay, Myanmar			KY769773	Nguyen et al., 2017
19	B. wanghaotingi	CIB104228	Nanning Zoo, Guangxi, China (locality uncertain)	MN165137	MN165165	MN165152	This study
20	B. multicinctus	UK Bm1	Zhejiang, China	AJ749344	AJ830238		Kuch, 2007
21	B. multicinctus	CIB DL18090209	Wuyi Moutain, Fujian, China	MN165138	MN165166	MN165153	This study
22	B. multicinctus	CIB DL18090210	Wuyi Moutain, Fujian, China	MN165139	MN165167	MN165154	This study
23	B. multicinctus	CIB93923	Guangxi, China	MN165136	MN165164	MN165151	This study
24	B. multicinctus	SYNU R180305	Haikou, Hainan, China	MN165135	MN165163	MN165150	This study
25	B. multicinctus	RN0296	Taiwan, China			KP749805	Chen & Lin, 2015
26	B. multicinctus	RN0304	Taiwan, China			KP749806	Chen & Lin, 2015
27	B. multicinctus	RN0869	Taiwan, China			KP749814	Chen & Lin, 2015
28	B. multicinctus	RN0893	Taiwan, China			KP749815	Chen & Lin, 2015
29	B. multicinctus	RN1073	Taiwan, China			KP749818	Chen & Lin, 2015
30	B. multicinctus	RN1198	Taiwan, China			KP749820	Chen & Lin, 2015
31	B. multicinctus	RN1231	Taiwan, China			KP749821	Chen & Lin, 2015
32	B. niger	Bnig	Nepal	AJ749304			Kuch, 2007
33	B. sindanus	Bsin1	Pakistan	AJ749346	AJ830242		Kuch, 2007
34	B. slowinskii	IEBR 1172	Na Hau Commune, Van Yen District, Yen Bai,Vietnam	AJ749306	AJ830250		Kuch, 2007
35	B. suzhenae sp. nov.	CAS 221526	Naung Mon Township, Rabaw Kachin State, Burma (Myanmar)	AJ749345	AJ830248		Kuch, 2007
36	B. suzhenae sp. nov.	CIB116088	Yingjiang, Yunnan, China	MN165140	MN165168	MN165155	This study
37	B. suzhenae sp. nov.	CIB116089	Yingjiang, Yunnan, China	MN165141	MN165169	MN165156	This study
38	B. suzhenae sp. nov.	CIB116090	Yingjiang, Yunnan, China	MN165142			This study
39	B. suzhenae sp. nov.	CIB116091	Yingjiang, Yunnan, China	MN165143	MN165170		This study
40	B. wanghaotingi	ROM 35250	Quang Thanh, Cao Bang, Vietnam	AJ749308	AJ830254		Kuch, 2007
41	B. wanghaotingi	ROM 35256	Chi Linh, Hia Duong, Vietnam	AJ749309	AJ830253		Kuch, 2007
42	B. wanghaotingi	UK BT6	Nakhon Si Thammarat, Thailand	AJ749331	AJ830246		Kuch, 2007
43	B. wanghaotingi	UK BT8	Nakhon Si Thammarat, Thailand	AJ749336	AJ830221		Kuch, 2007
44	B. wanghaotingi	FMNH 255259	Hin Nam No National Biodiversity Conservation Area, Boualapha District, Khammouan, Laos	AJ749337	AJ830222		Kuch, 2007
45	B. wanghaotingi	FMNH 255260	Nam Et Phou Louey Mountain, Phou Louey National Biodiversity, Conservation Area, Vieng Tong, Huaphahn, Laos	AJ749338	AJ830247		Kuch, 2007
46	B. wanghaotingi	CIB FCDZ20170806	Dongzhong, Fangchenggang, Guangxi, China	MN165131	MN165160		This study
47	B. wanghaotingi	CIB104227	Beiliu, Guangxi, China	MN165134	MN165162	MN165149	This study
48	B. wanghaotingi	SYNU R170408	Bang Lang National Park, Yala, Thailand	MN165132		MN165147	This study
49	B. wanghaotingi	CIB ML20170801	Menglun, Yunnan, China	MN165145	MN165172	MN165158	This study
50	B. wanghaotingi	CIB MLMY20170801	Mengla, Yunnan, China	MN165144	MN165171	MN165157	This study
51	B. wanghaotingi	JK20181101	Jinghong, Yunnan, China	MN165146	MN165173	MN165159	This study
52	B. wanghaotingi	GP 3375	Xishuangbanna, Yunnan Province, China	KY952766			Xie, et al., 2018
53	B. wanghaotingi	KIZ 1326	Ta Kou NR, Binh Thuan, Vietnam			KY769759	Nguyen et al., 2017
54	B. wanghaotingi	ITBCZ 900	Nui Chua NP, Ninh Thuan, Vietnam			KY769760	Nguyen et al., 2017
55	B. wanghaotingi	ITBCZ 1040	Nui Chua NP, Ninh Thuan, Vietnam			KY769761	Nguyen et al., 2017
56	B. wanghaotingi	HUS 300	Bach Ma NP, Thua Thien–Hue, Vietnam			KY769762	Nguyen et al., 2017
57	Naja atra	No voucher	China	DQ343648	DQ343648	DQ343648	Yan et al., 2008

## Sheet: Table S2
Table S2. Best evolution models of each partition combination.
Subset	Best Model	Sites (bp)	Subset Partition
1	GTR+G	667	cyt b 1st, ND4 1st
2	HKY+I	667	cyt b 2nd, ND4 2nd
3	HKY+G	667	cyt b 3rd, ND4 3rd

## Sheet: Table S3
Table S3. Uncorrected p-distances between Bungarus species based on 1069 base pairs from the mitochondrial genes cyt b.
No.	Voucher	Taxa	1	2	3	4	5	6	7	8	9	10	11	12	13	14	15	16	17	18	19
1	GP3375	Bungarus wanghaotingi
2	ROM 35250	B. wanghaotingi	0.00862603
3	ML20170801	B. wanghaotingi	0.00285984	0.011534
4	SJS20181102	B. wanghaotingi	0.0105735	0.0134945	0.0134955
5	UK BT6	B. wanghaotingi	0.0107801	0.0097909	0.01376	0.0137738
6	UK BcBa	B. candidus	0.0213435	0.0223345	0.0223345	0.0243485	0.0228004
7	UK B39	B. candidus	0.0223578	0.0233517	0.0233517	0.0253728	0.0238398	0.0028625
8	DL18090209	B. multicinctus	0.0253218	0.0263204	0.0263204	0.026349	0.0248315	0.0233292	0.0243495
9	DL18090210	B. multicinctus	0.0253218	0.0263204	0.0263204	0.026349	0.0248315	0.0233292	0.0243495	0
10	CIB116088	B. suzhenae sp. nov.	0.0961027	0.103097	0.0972621	0.099713	0.0970949	0.103102	0.106764	0.0961027	0.0961027
11	CIB116089	B. suzhenae sp. nov.	0.0961027	0.103097	0.0972621	0.099713	0.0970949	0.103102	0.106764	0.0961027	0.0961027	0.00190483
12	CAS 221526	B. suzhenae sp. nov.	0.0984282	0.105454	0.0995927	0.102057	0.099473	0.105458	0.10914	0.0984282	0.0984282	0.00190476	0.00381675
13	Bnig	B. niger	0.107548	0.106369	0.10873	0.112433	0.105188	0.11709	0.117235	0.11231	0.11231	0.100296	0.100296	0.10263
14	UK H7	B. caeruleus	0.177553	0.187297	0.177545	0.180577	0.186294	0.185894	0.184761	0.185903	0.185903	0.17289	0.17289	0.17561	0.1747
15	RS-135	B. ceylonicus	0.173584	0.177679	0.174945	0.169755	0.176501	0.177687	0.182072	0.177679	0.177679	0.164128	0.164128	0.166793	0.176246	0.124514
16	Bsin1	B. sindanus	0.164174	0.165524	0.162829	0.163054	0.155915	0.168256	0.169854	0.161508	0.161508	0.170934	0.170934	0.173656	0.156209	0.168655	0.156888
17	UK B24	B. fasciatus	0.182298	0.189271	0.183686	0.177042	0.189752	0.182324	0.186766	0.182332	0.182332	0.181797	0.184582	0.184573	0.177679	0.189746	0.228821	0.210555
18	KIZ 98R0186	B. bungaroides	0.224391	0.224391	0.225977	0.228724	0.237075	0.221311	0.224786	0.227591	0.227591	0.243616	0.246868	0.245239	0.239595	0.274811	0.275094	0.26152	0.228136
19	IEBR 1172	B. slowinskii	0.23092	0.224248	0.22867	0.230422	0.237746	0.239983	0.242264	0.228752	0.228752	0.225159	0.227359	0.227343	0.227841	0.273874	0.285732	0.262458	0.223909	0.104798
20	JAM 1946	B. flaviceps	0.249667	0.249667	0.253005	0.255116	0.248245	0.249706	0.251798	0.246388	0.246388	0.243945	0.247226	0.247213	0.258808	0.279988	0.263627	0.286651	0.24676	0.245558	0.252461

## Sheet: Table S4
Table 4. Uncorrected p-distances between Bungarus species based on 613 base pairs from the mitochondrial genes COI.
No.	Voucher	Taxa	1	2	3	4	5	6	7	8	9	10	11	12	13	14
1	ITBCZ 900	B. m. wanghaotingi
2	KIZ 1326	B. m. wanghaotingi	0.00711599
3	BCA1	B. m. wanghaotingi	0.0125059	0.00531275
4	SYNU R180411	B. m. wanghaotingi	0.0125059	0.00531275	0.00822081
5	HUS 300	B. m. wanghaotingi	0.00890756	0.00176595	0.00353686	0.00353686
6	SYNU R170408	B. m. multicinctus	0.0234615	0.0160989	0.0233601	0.0216308	0.01429
7	DL18090209	B. m. multicinctus	0.0217451	0.0143676	0.0166327	0.0183473	0.0125537	0.0234441
8	DL18090210	B. m. multicinctus	0.0217451	0.0143676	0.0166327	0.0183473	0.0125537	0.0234441	0
9	CAS 210696	B. magnimaculatus	0.079997	0.0802806	0.0823141	0.0742154	0.078253	0.0865533	0.0826948	0.0826948
10	CAS 215445	B. magnimaculatus	0.079997	0.0802806	0.0823141	0.0742154	0.078253	0.0865533	0.0826948	0.0826948	0
11	CAS 215958	B. magnimaculatus	0.0676826	0.0637361	0.0657065	0.0617713	0.0617713	0.0697853	0.0660018	0.0660018	0.0272991	0.0272991
12	CAS 215998	B. magnimaculatus	0.0696643	0.0657065	0.0676826	0.0637361	0.0637361	0.0717765	0.0679875	0.0679875	0.0254425	0.0254425	0.00176595
13	CIB116088	B. suzhenae sp. nov.	0.0702513	0.066257	0.0760753	0.0743249	0.0642686	0.075951	0.070543	0.070543	0.0387312	0.0387312	0.0329226	0.0348019
14	CIB116089	B. suzhenae sp. nov.	0.0702513	0.066257	0.0760753	0.0743249	0.0642686	0.075951	0.070543	0.070543	0.0387312	0.0387312	0.0329226	0.0348019	0
15	MVZ226610	B. fasciatus	0.156934	0.156934	0.15226	0.149934	0.154593	0.15226	0.159468	0.159468	0.156798	0.156798	0.145056	0.145056	0.154593	0.154593
